# Supplementary material for: Classification of bloodstains deposited at different times on floor tiles using hierarchical modelling and a handheld NIR spectrometer
Source: Royal Society of Chemistry journal article supplement (doi:10.1039/d3ay01204b), 2023-01-01

### Supplementary Material

**Table 1.** Spectra collected on each day.

| Day | Number of Spectra |     |
|-----|-------------------|-----|
|     | HB                | AB  |
| 0   | 492               | 201 |
| 1   | 487               | 184 |
| 9   | 492               | -   |
| 10  | -                 | 200 |
| 13  | -                 | 193 |
| 20  | 486               | 201 |
| 29  | -                 |     |
| 30  | 484               | -   |
| 105 | -                 | 200 |
| 162 | 500               | -   |
| 176 | -                 | 200 |

**Figure S1.** A) Average original human blood spectra; b) Average pre-processed (1st Savitzky-Golay derivative technique with 15 smoothing points and a 2<sup>nd</sup> degree polynomial) human blood spectra; c) Average original Animal blood spectra; d) Average pre-processed (1st Savitzky-Golay derivative technique with 15 smoothing points and a 2<sup>nd</sup> degree polynomial) animal blood spectra.

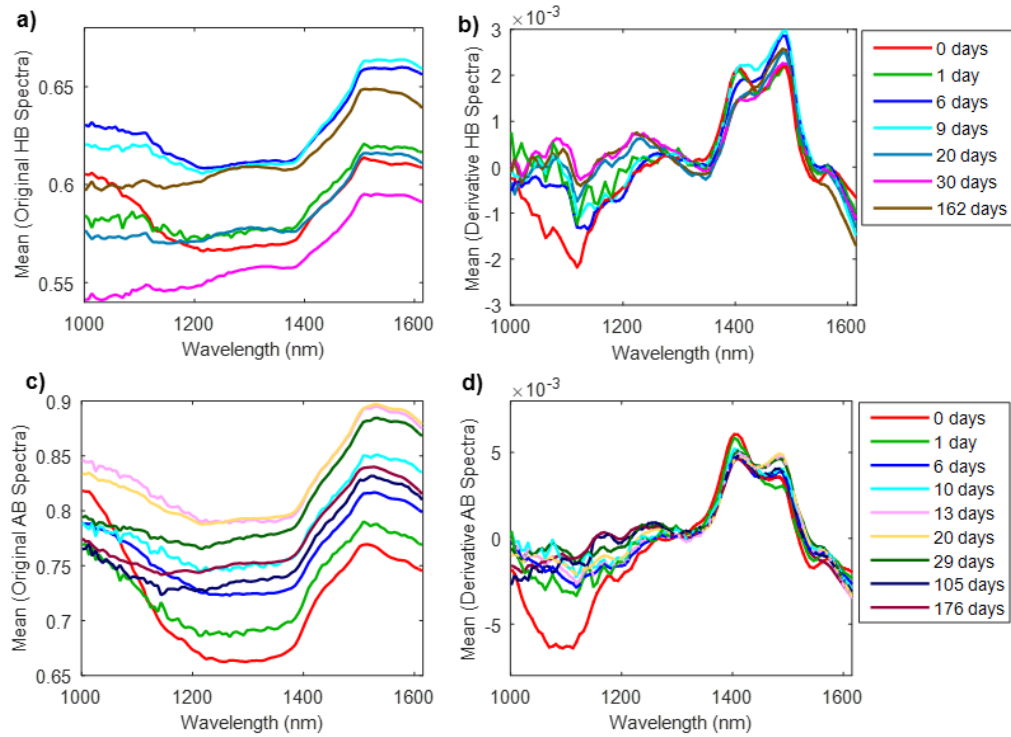

**Table S2.** Resume of the Hierarchical Models

| Hierarchical Model | Training Set Age | Training Set Spectra |     | 1 <sup>st</sup> Decision Rule | 2 <sup>nd</sup> Decision Rule |
|--------------------|------------------|----------------------|-----|-------------------------------|-------------------------------|
|                    |                  | HB                   | AB  |                               |                               |
| HM1.a              | 6 days           | 365                  | 168 | SIMCA_Q                       | SIMCA_Q                       |
| HM1.b              | (6 + 0) days     | 721                  | 338 |                               |                               |
| HM1.c              | (6 + 1) days     | 716                  | 323 |                               |                               |
| HM1.d              | (6 + 0 + 1) days | 1072                 | 493 |                               |                               |
| HM2.a              | 6 days           | 365                  | 168 | SIMCA_Q                       | SIMCA                         |
| HM2.b              | (6 + 0) days     | 721                  | 338 |                               |                               |
| HM2.c              | (6 + 1) days     | 716                  | 323 |                               |                               |
| HM2.d              | (6 + 0 + 1) days | 1072                 | 493 |                               |                               |
| HM3.a              | 6 days           | 365                  | 168 | SIMCA_Q                       | PLS-DA                        |
| HM3.b              | (6 + 0) days     | 721                  | 338 |                               |                               |
| HM3.c              | (6 + 1) days     | 716                  | 323 |                               |                               |
| HM3.d              | (6 + 0 + 1) days | 1072                 | 493 |                               |                               |

The first number of the models refers to the technique used as second rule (HM1 – SIMCA\_Q, HM2 – SIMCA and HM3 – PLS-DA). The letter refers to the training set age used (HM\*.a – samples with 6 days; HM\*.b - 6 days and fresh samples (6 + 0); HM\*.c – six and one days samples (6 + 1) days); HM\*.d – six, zero and one days samples (6 + 0 + 1) days.

**Table S3.** Distribution of spectra used for external validation.

| External Validation |                      |                            |                            |                                |
|---------------------|----------------------|----------------------------|----------------------------|--------------------------------|
|                     | HM built with 6 days | HM built with (6 + 0) days | HM built with (6 + 1) days | HM built with (6 + 0 + 1) days |
| Days                | N° of HB Spectra     |                            |                            |                                |
| 0                   | 492                  | 136                        | 492                        | 136                            |
| 1                   | 487                  | 487                        | 136                        | 136                            |
| 9                   | 492                  | 492                        | 492                        | 492                            |
| 20                  | 486                  | 486                        | 486                        | 486                            |
| 30                  | 484                  | 484                        | 484                        | 484                            |
| 162                 | 500                  | 500                        | 500                        | 500                            |
| Days                | N° of AB Spectra     |                            |                            |                                |
| 0                   | 201                  | 31                         | 201                        | 31                             |
| 1                   | 184                  | 184                        | 32                         | 32                             |
| 10                  | 200                  | 200                        | 200                        | 200                            |
| 13                  | 193                  | 193                        | 193                        | 193                            |
| 20                  | 201                  | 201                        | 201                        | 201                            |
| 29                  | 201                  | 201                        | 201                        | 201                            |
| 105                 | 200                  | 200                        | 200                        | 200                            |
| 176                 | 200                  | 200                        | 200                        | 200                            |

**Figure S2.** Human Blood PCA model; a. PC1xPC2xPC3 score plot (coloured according to aging time classes); b. PC1xPC2xPC3 loadings plot

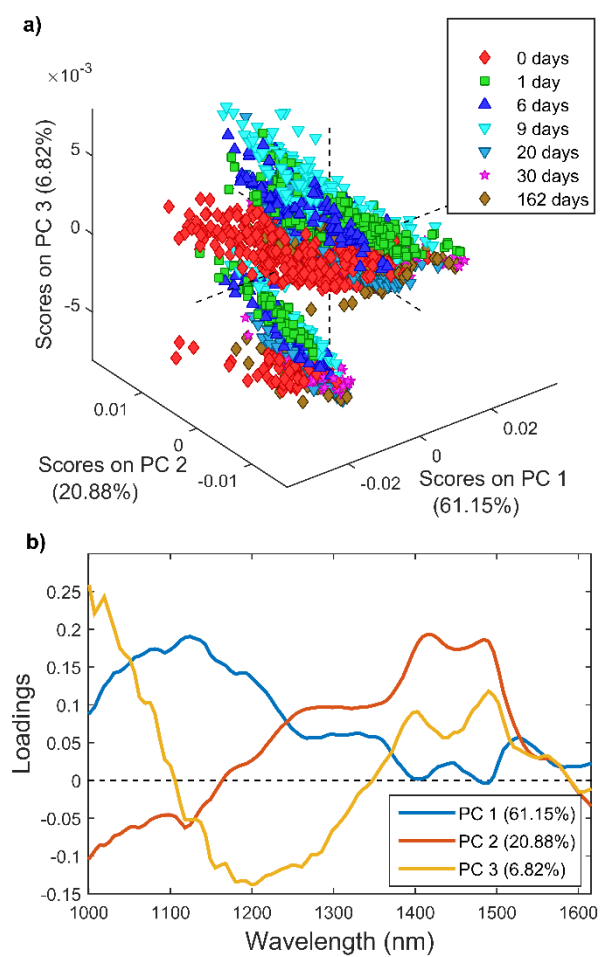

Supplement: d3ay01204b4.pdf [file d3ay01204b4.pdf]
