# Supplementary material for: Classification of bloodstains deposited at different times on floor tiles using hierarchical modelling and a handheld NIR spectrometer
Source: Royal Society of Chemistry journal article supplement (doi:10.1039/d3ay01204b), 2023-01-01
Supplement: d3ay01204b6.pdf [file d3ay01204b6.pdf]

**Table S2.** Resume of the Hierarchical Models

| Hierarchical Model | Training Set Age | Training Set Spectra |     | 1 <sup>st</sup> Decision Rule | 2 <sup>nd</sup> Decision Rule |
|--------------------|------------------|----------------------|-----|-------------------------------|-------------------------------|
|                    |                  | HB                   | AB  |                               |                               |
| HM1.a              | 6 days           | 365                  | 168 | SIMCA_Q                       | SIMCA_Q                       |
| HM1.b              | (6 + 0) days     | 721                  | 338 |                               |                               |
| HM1.c              | (6 + 1) days     | 716                  | 323 |                               |                               |
| HM1.d              | (6 + 0 + 1) days | 1072                 | 493 |                               |                               |
| HM2.a              | 6 days           | 365                  | 168 | SIMCA_Q                       | SIMCA                         |
| HM2.b              | (6 + 0) days     | 721                  | 338 |                               |                               |
| HM2.c              | (6 + 1) days     | 716                  | 323 |                               |                               |
| HM2.d              | (6 + 0 + 1) days | 1072                 | 493 |                               |                               |
| HM3.a              | 6 days           | 365                  | 168 | SIMCA_Q                       | PLS-DA                        |
| HM3.b              | (6 + 0) days     | 721                  | 338 |                               |                               |
| HM3.c              | (6 + 1) days     | 716                  | 323 |                               |                               |
| HM3.d              | (6 + 0 + 1) days | 1072                 | 493 |                               |                               |

The first number of the models refers to the technique used as second rule (HM1 – SIMCA\_Q, HM2 – SIMCA and HM3 – PLS-DA). The letter refers to the training set age used (HM\*.a – samples with 6 days; HM\*.b - 6 days and fresh samples (6 + 0); HM\*.c – six and one days samples (6 + 1) days); HM\*.d – six, zero and one days samples (6 + 0 + 1) days.
